# Supplementary material
Source: publisher site journal article supplement (https://www.spandidos-publications.com/197/downloadSupplementary)
Supplement: Supplementary file 1 [file downloadSupplementary]

Table SI. ECOG performance status.

| Grade | ECOG performance status                                                                                                                                   |
|-------|-----------------------------------------------------------------------------------------------------------------------------------------------------------|
| 0     | Fully active, able to carry on all pre-disease performance without restriction                                                                            |
| 1     | Restricted in physically strenuous activity but ambulatory and able to carry out work of a light or sedentary nature, e.g., light house work, office work |
| 2     | Ambulatory and capable of all selfcare but unable to carry out any work activities; $\geq 50\%$ of waking hours                                           |
| 3     | Capable of only limited selfcare; confined to bed or chair $>50\%$ of waking hours                                                                        |
| 4     | Completely disabled; cannot carry on any selfcare; totally confined to bed or chair                                                                       |
| 5     | Succumbed to the disease                                                                                                                                  |

ECOG, Eastern Cooperative Oncology Group.
